# Supplementary material for: Designed Ankyrin Repeat Proteins as a tool box for analyzing p63
Source: Springer Nature journal article supplement (doi:10.1038/s41418-022-01030-y), 2022-06-18

Raw data figure 1F

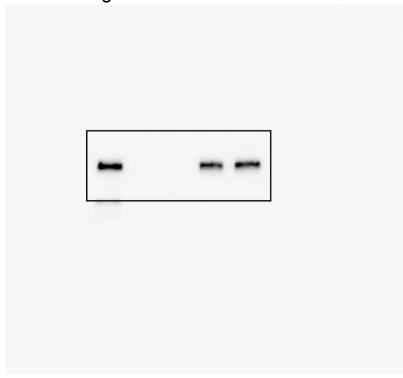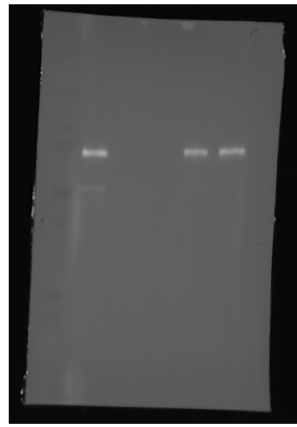

$\Delta$ Np63 $\alpha$  Replicate 1

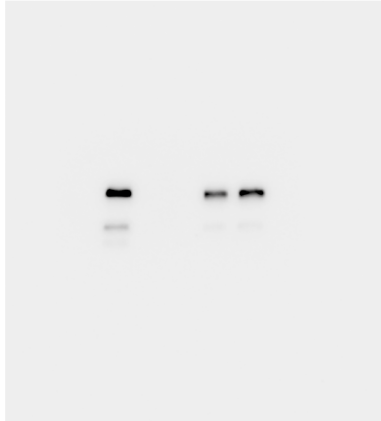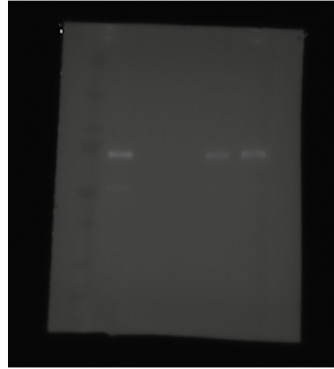

$\Delta$ Np63 $\alpha$  Replicate 2

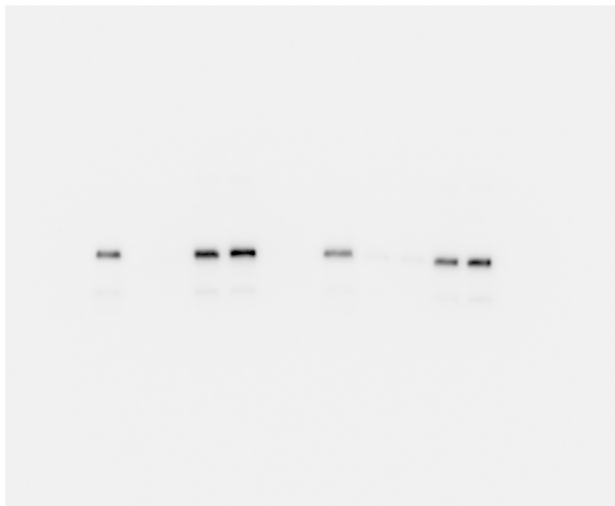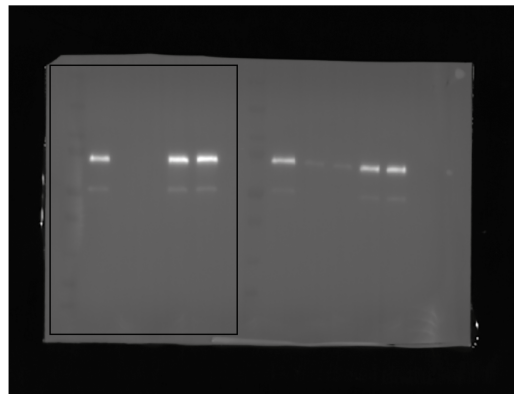

$\Delta$ Np63 $\alpha$  Replicate 3

Raw data figure 1G

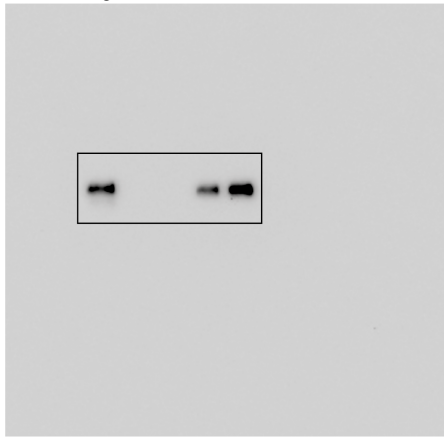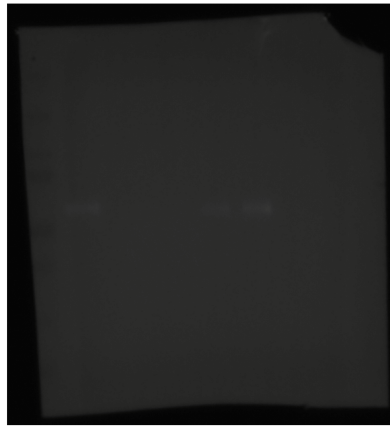

TAp63y Replicate 1

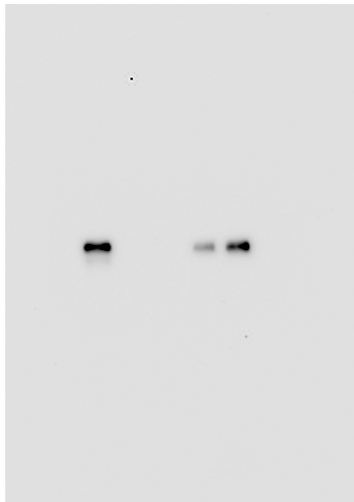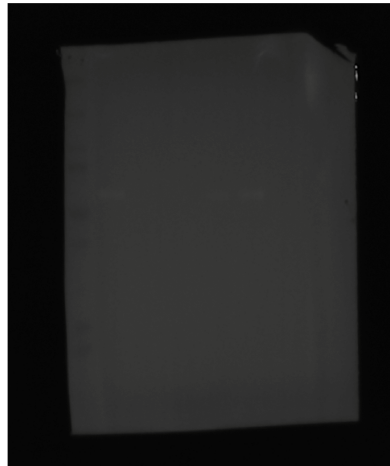

TAp63y Replicate 2

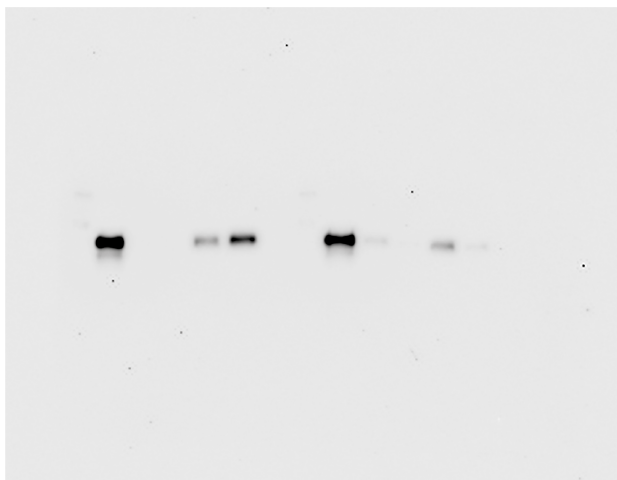

TAp63y Replicate 3

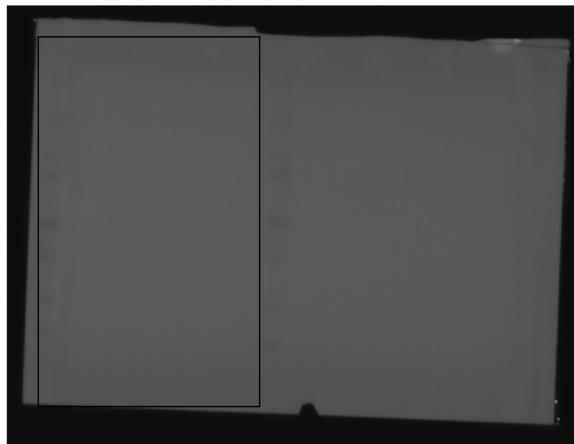

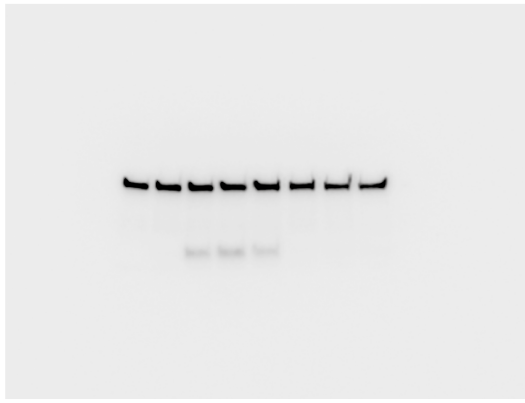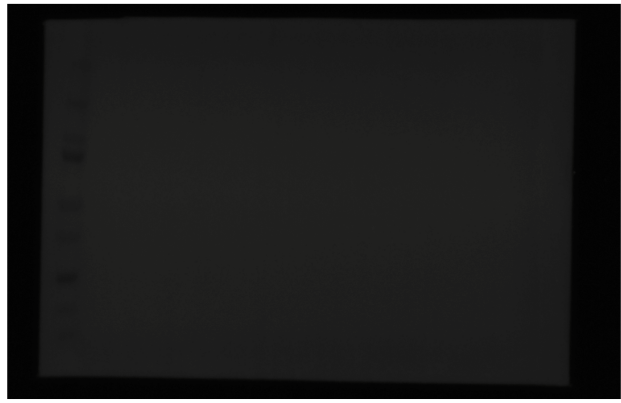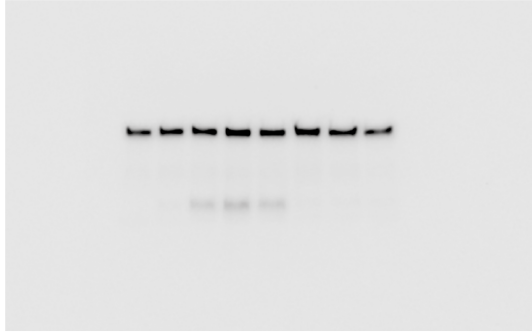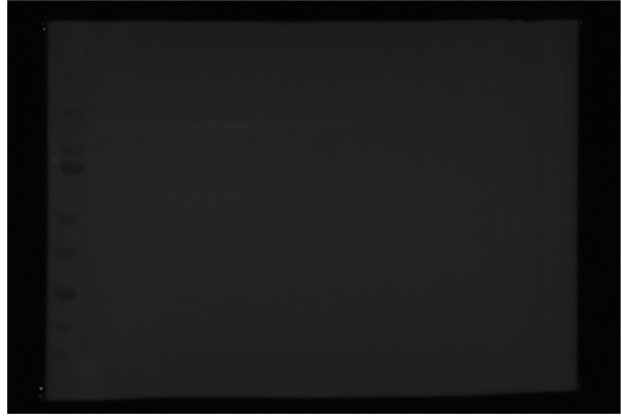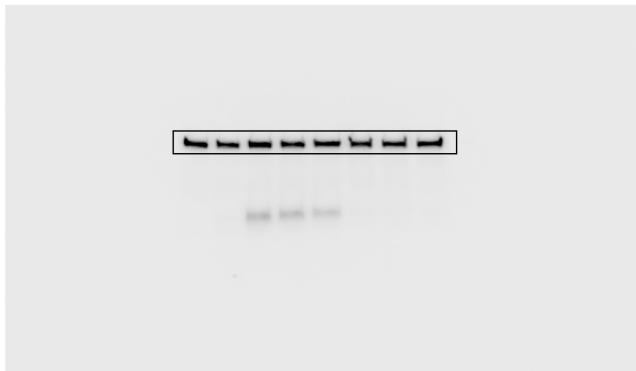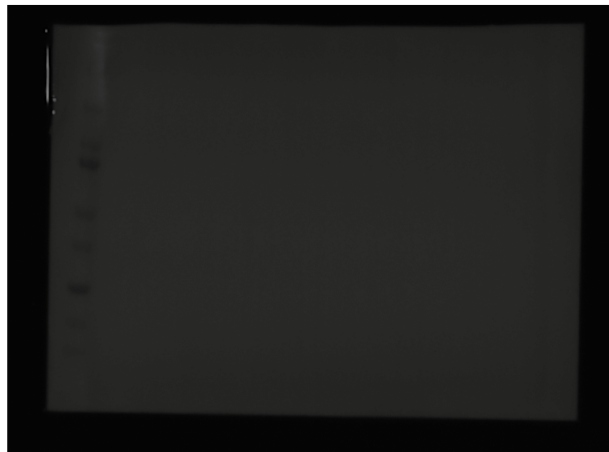

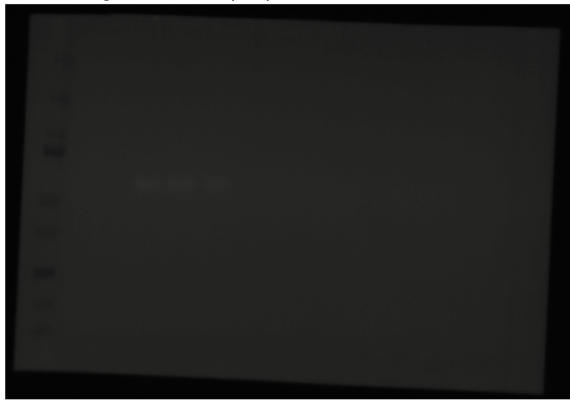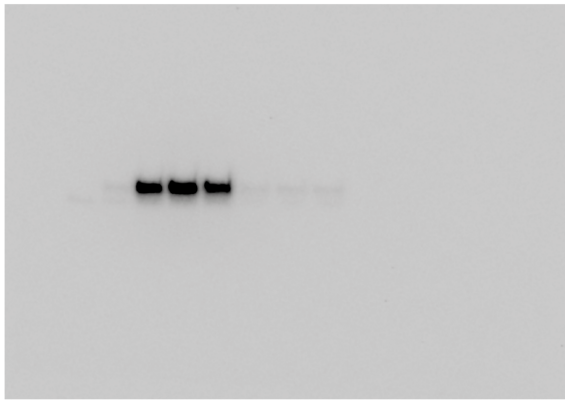

Replicate 1

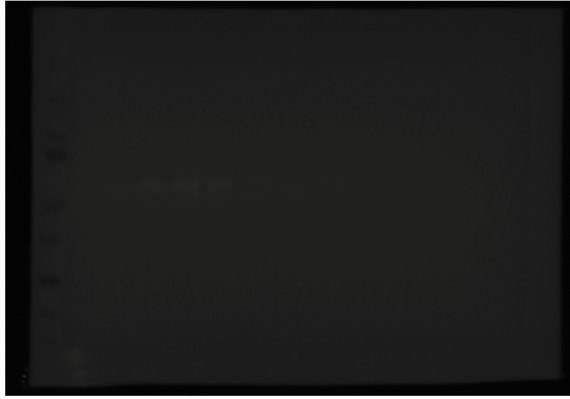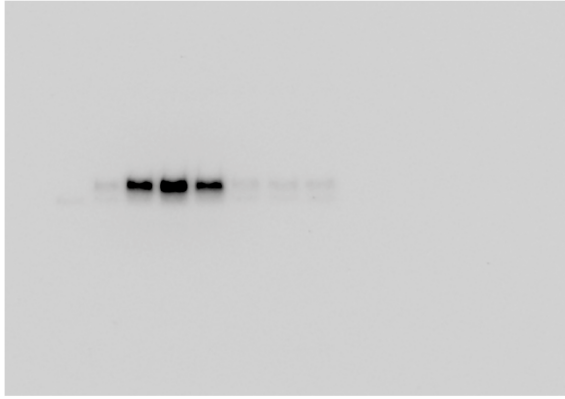

Replicate 2

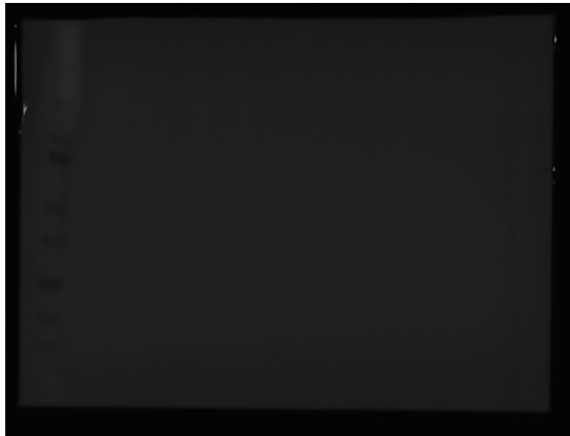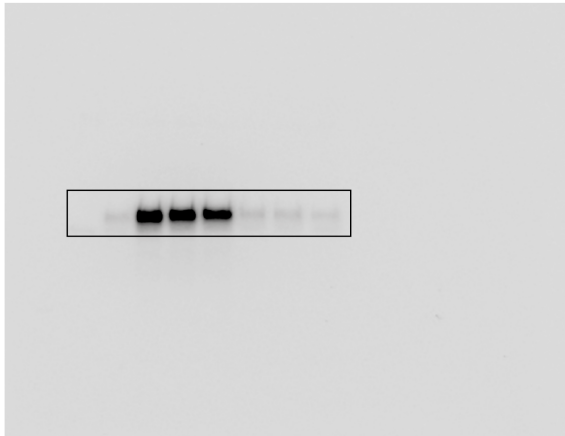

Replicate 3

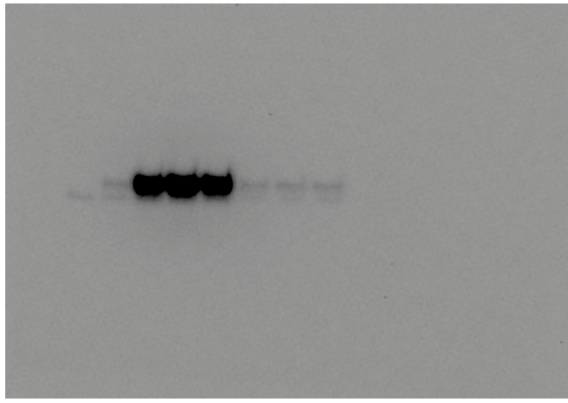

Replicate 1

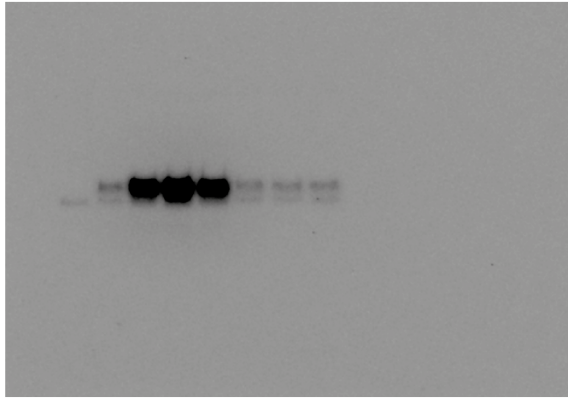

Replicate 2

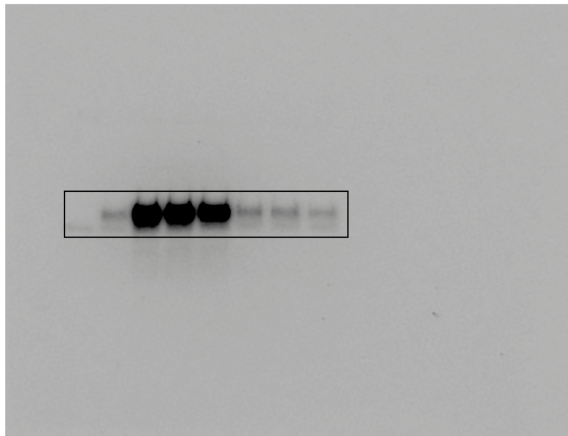

Replicate 3

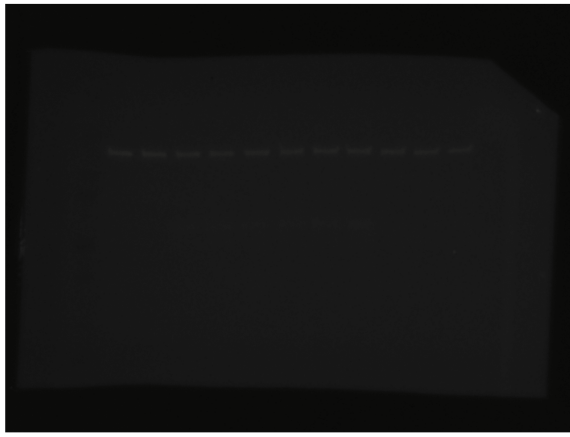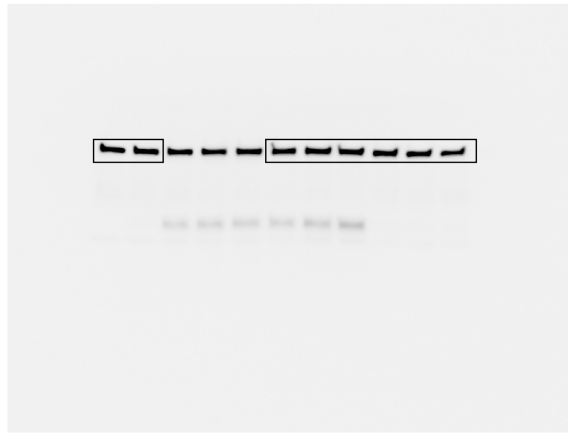

Replicate 1

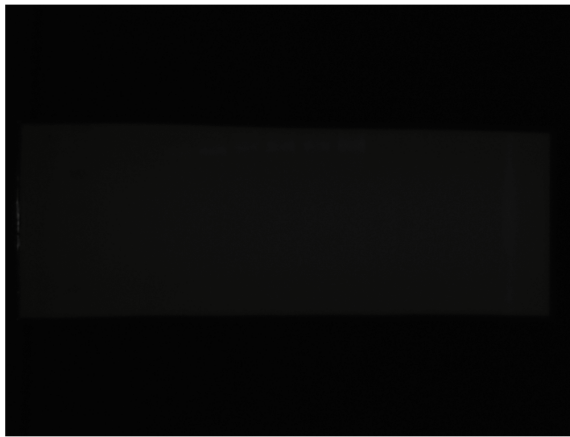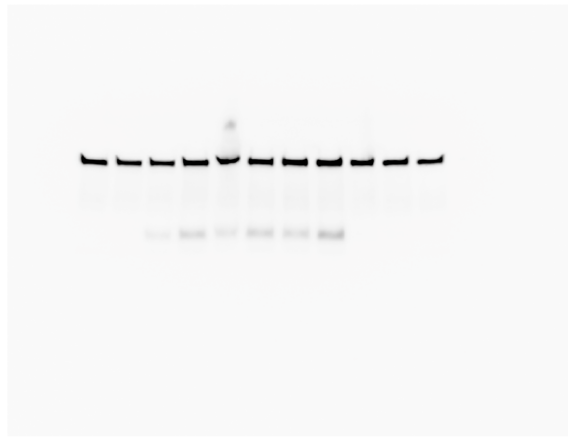

Replicate 2

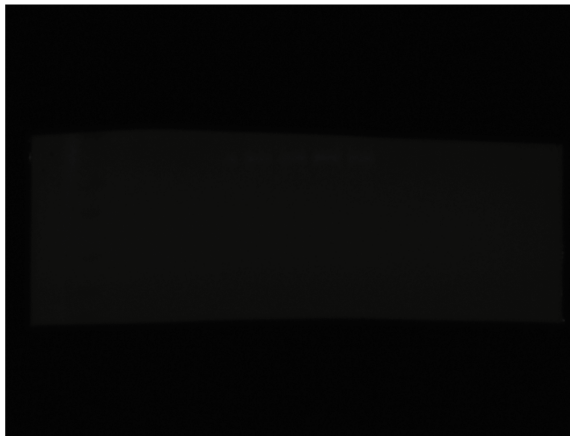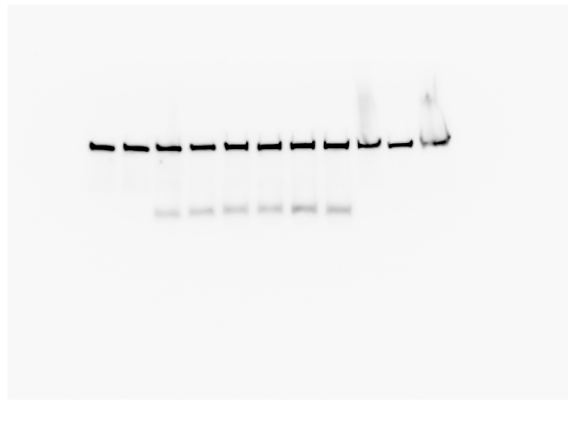

Replicate 3

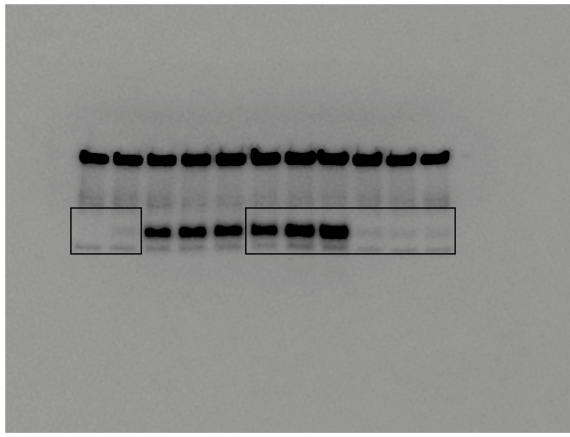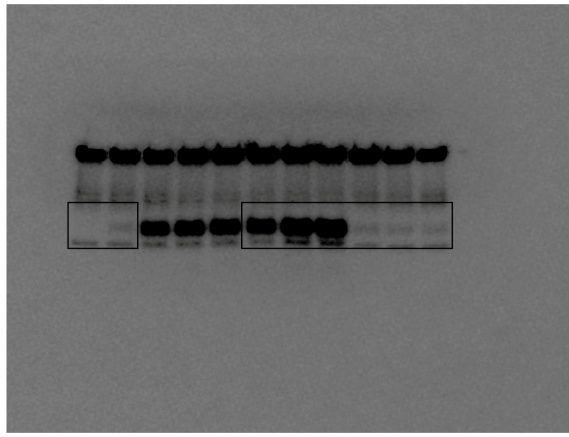

Replicate 1

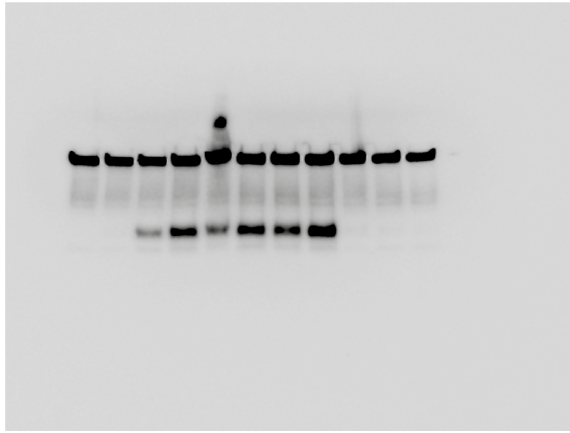

Replicate 2

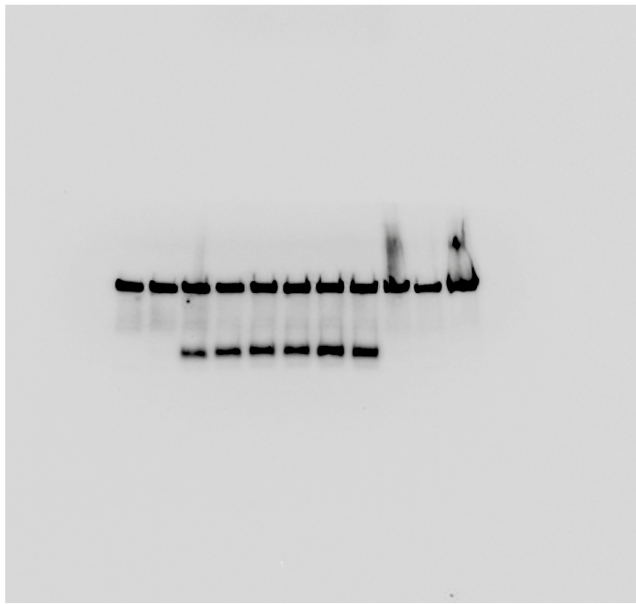

Replicate 3

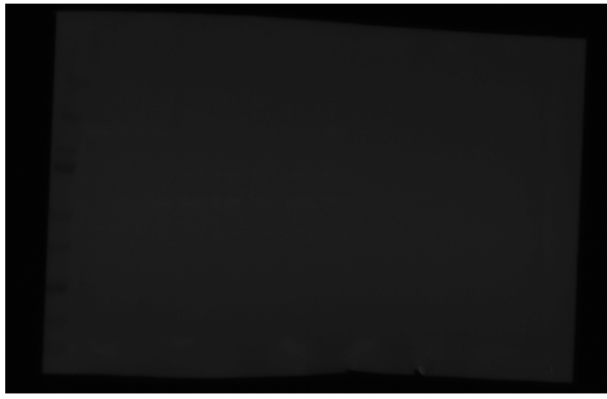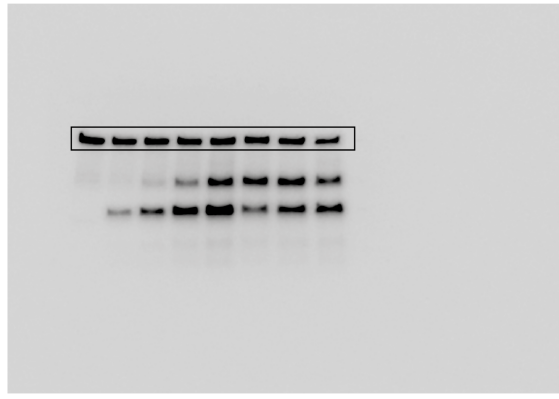

Replicate 1

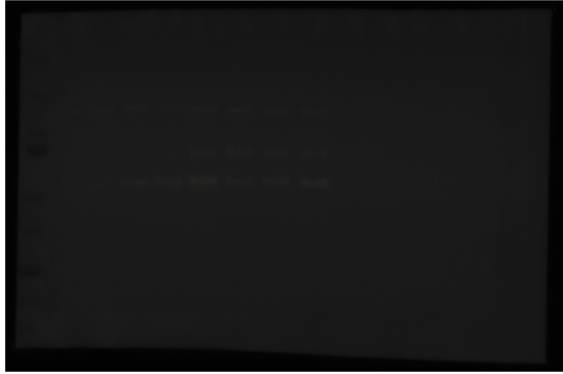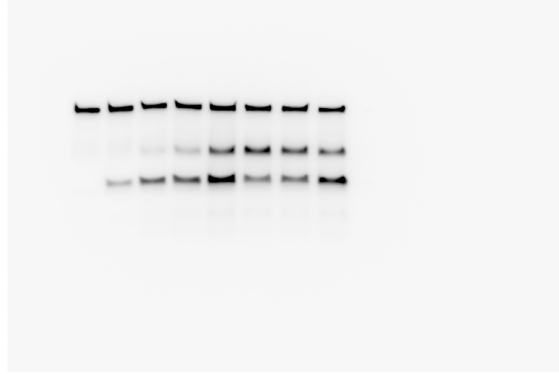

Replicate 2

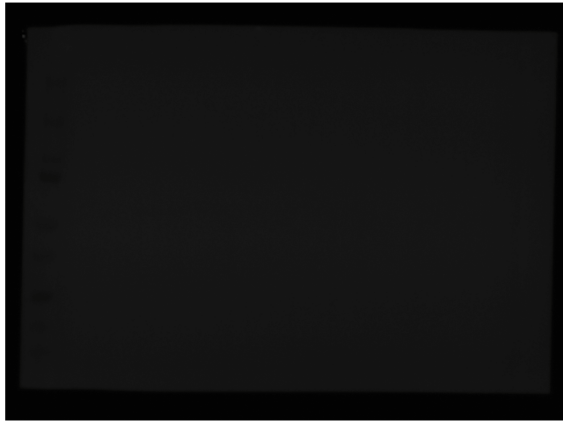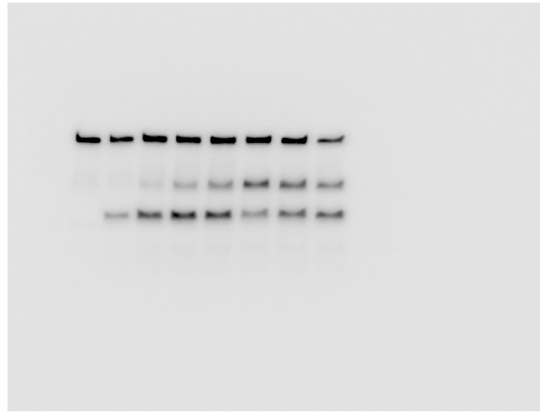

Replicate 3



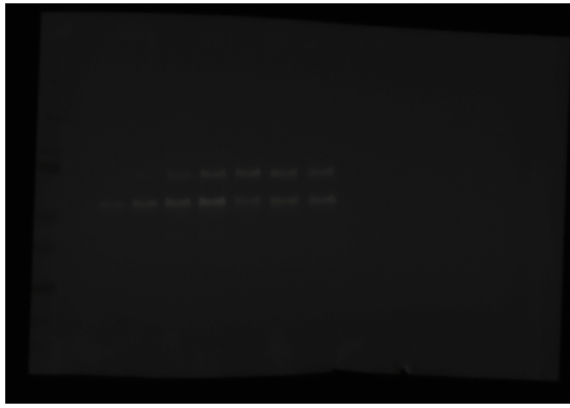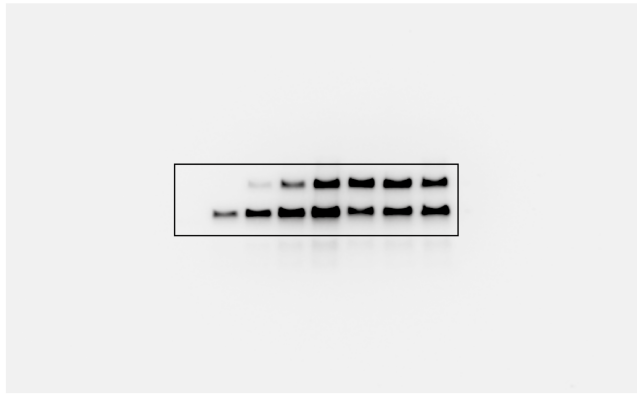

Replicate 1

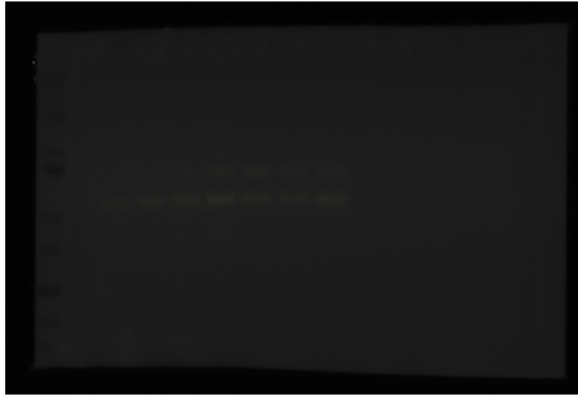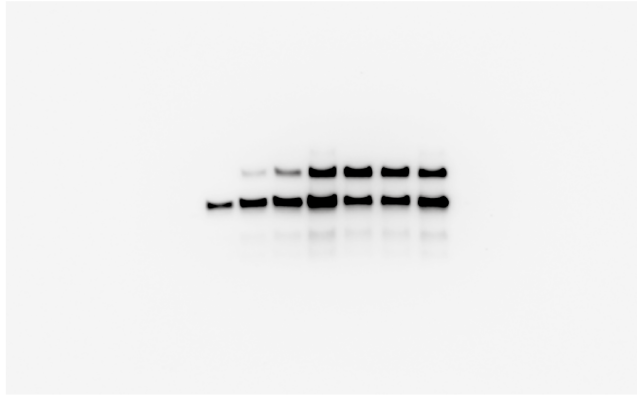

Replicate 2

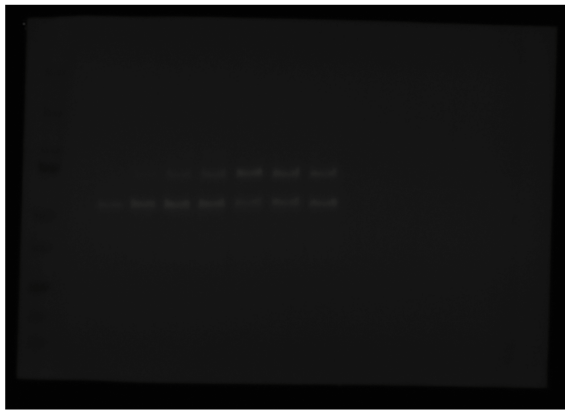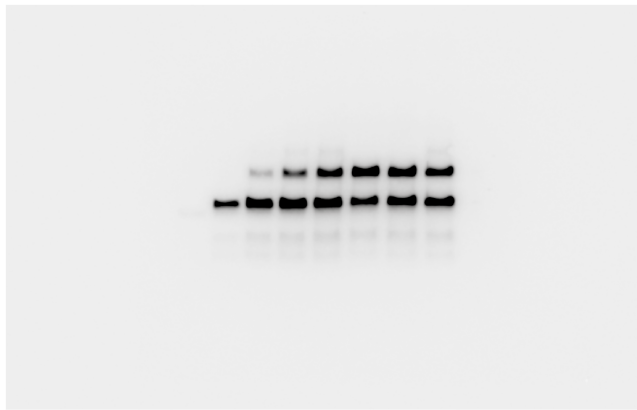

Replicate 3

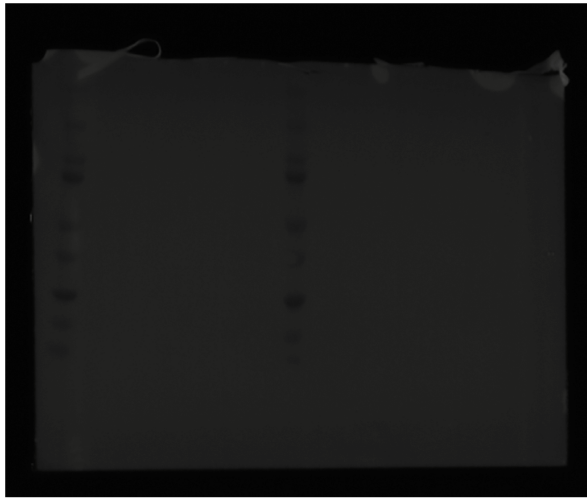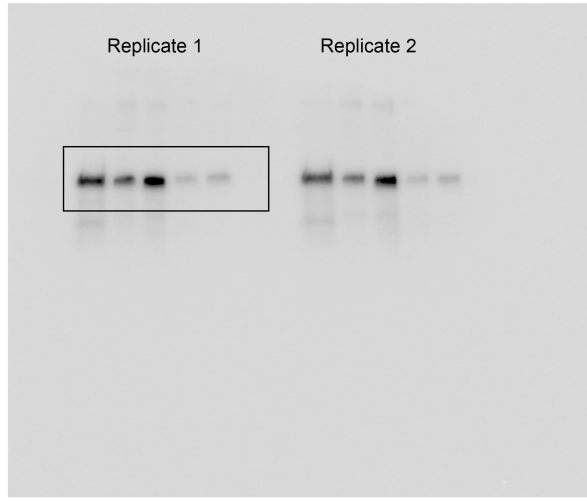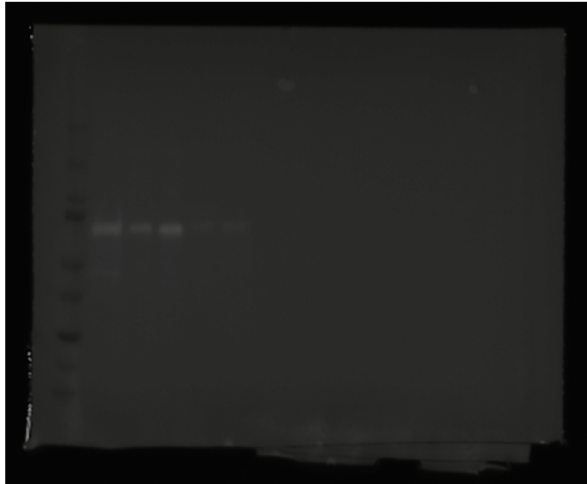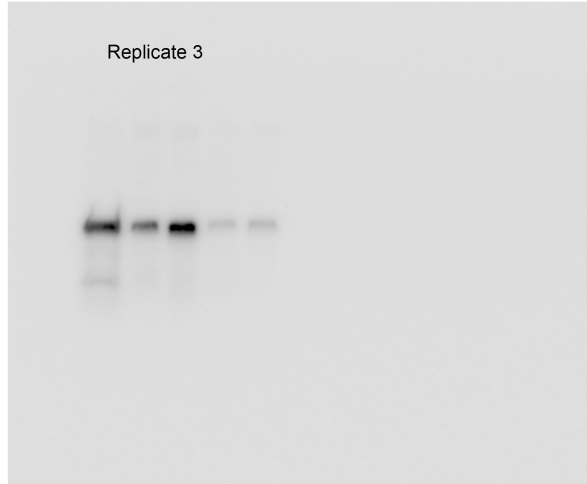

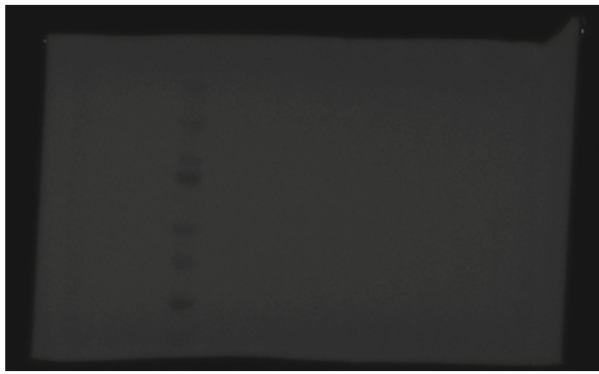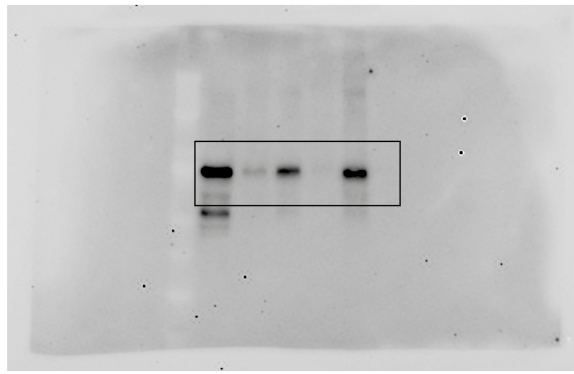

Replicate 1

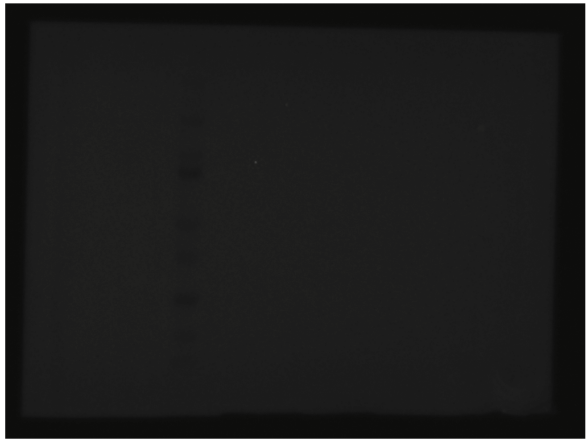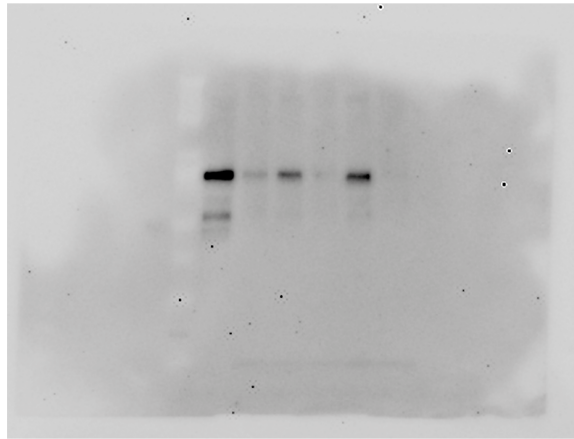

Replicate 2

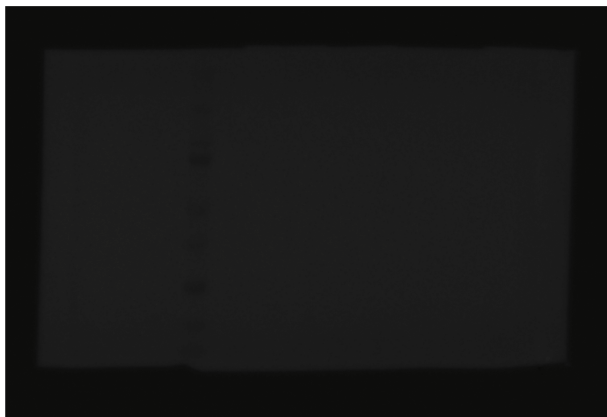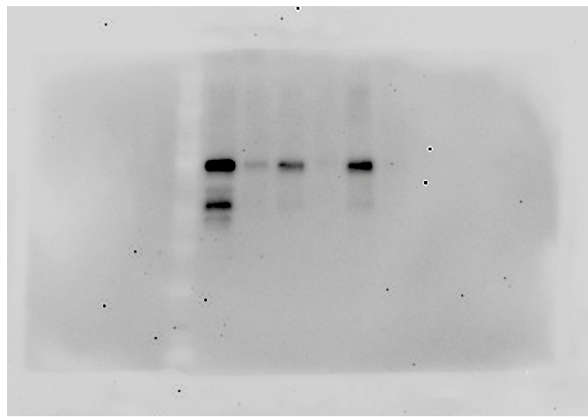

Replicate 3

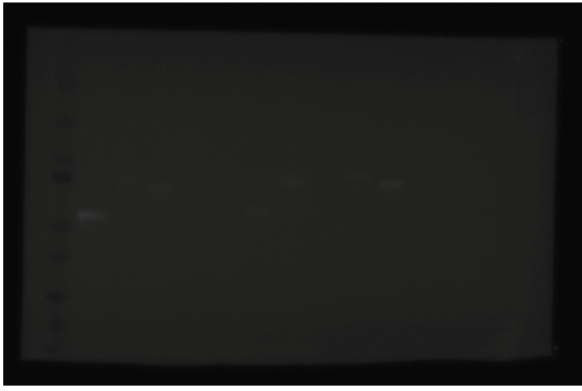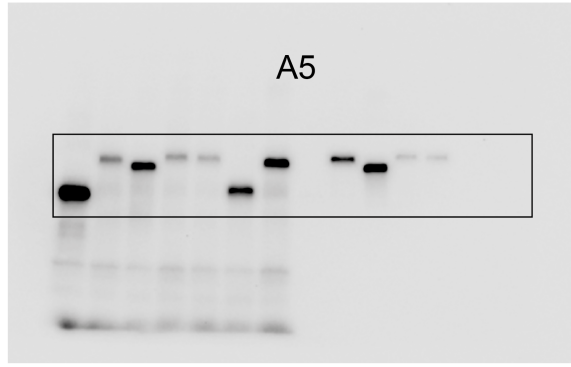

Replicate 1

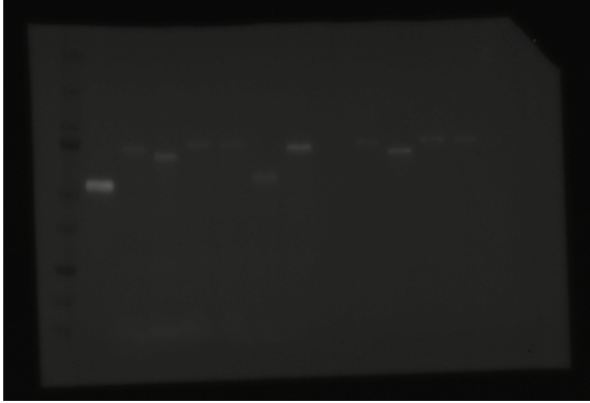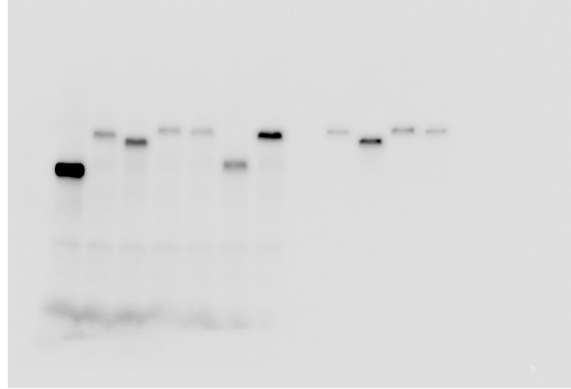

Replicate 2

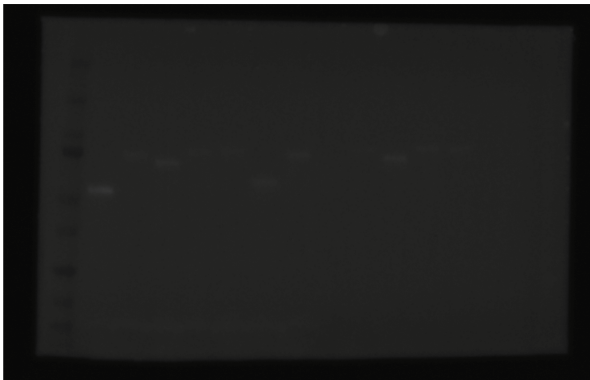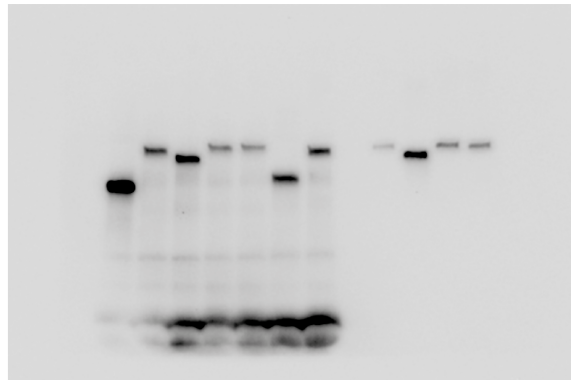

Replicate 3

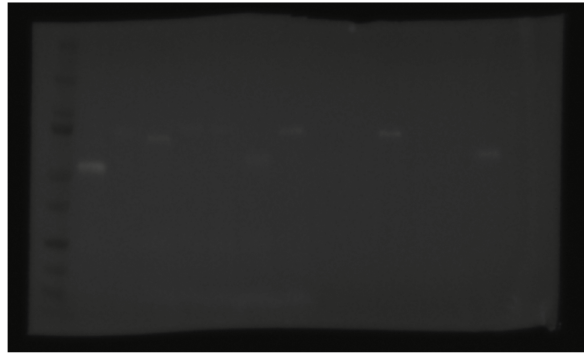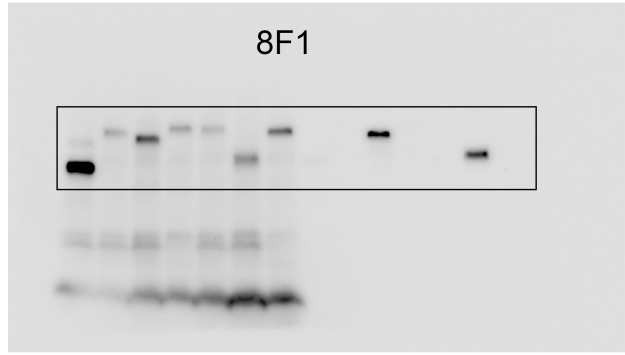

Replicate 1

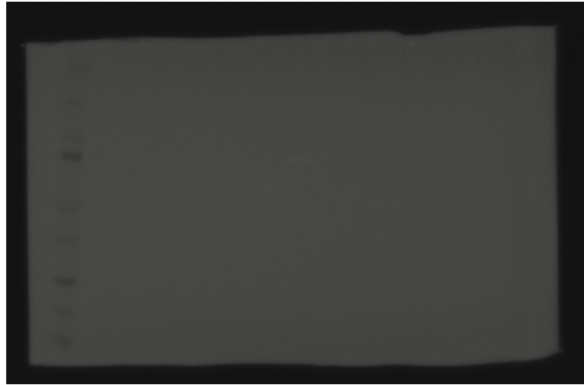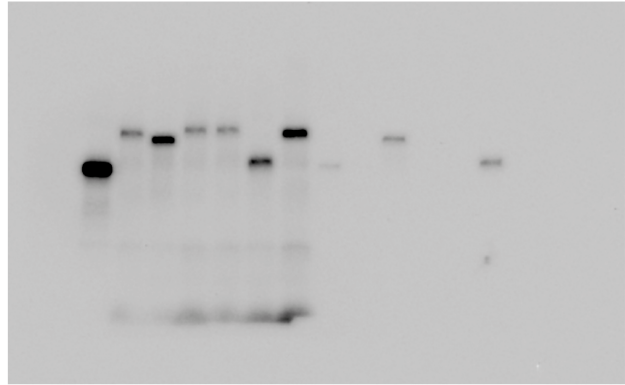

Replicate 2

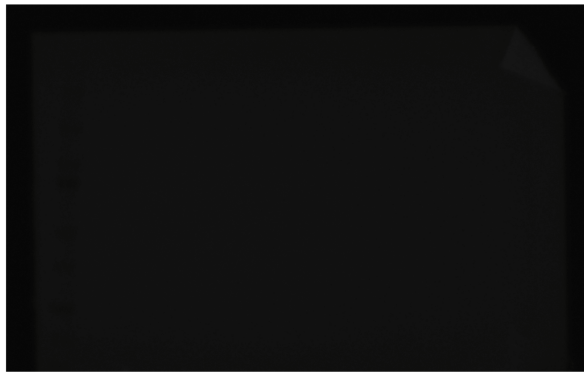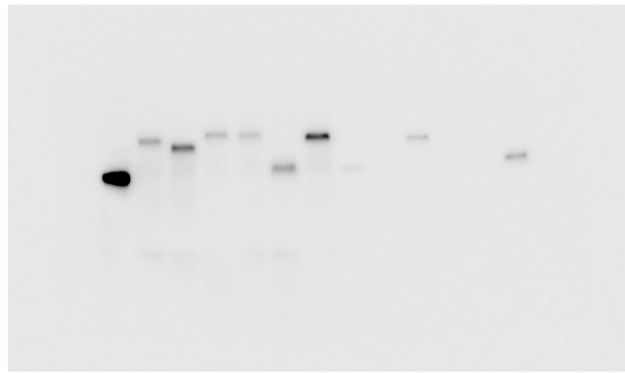

Replicate 3

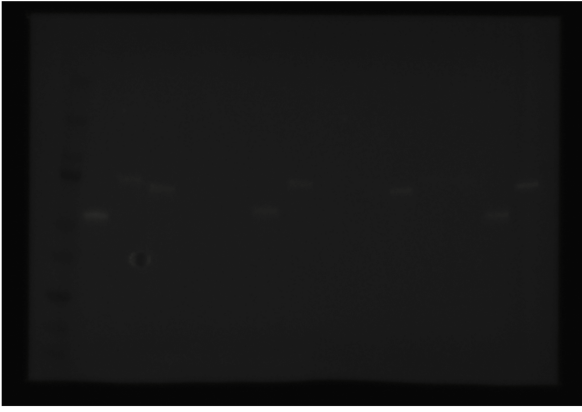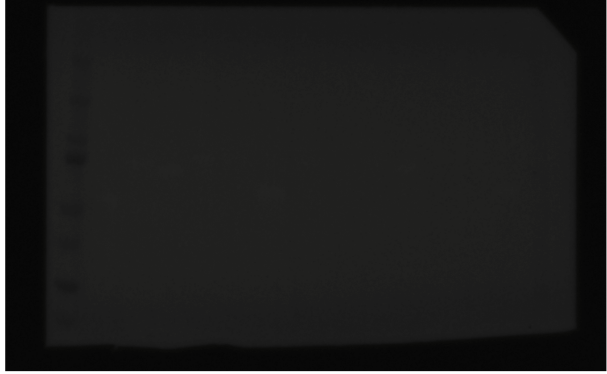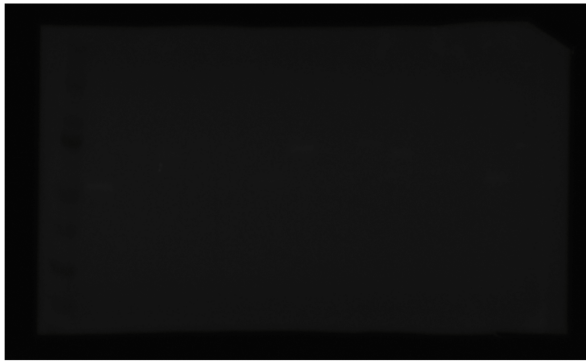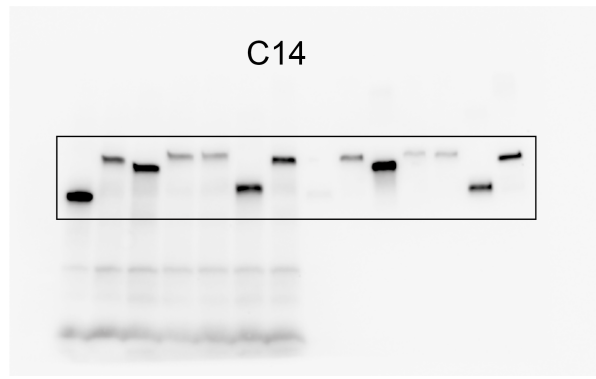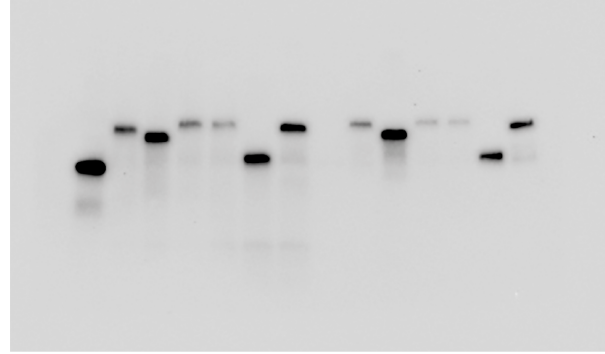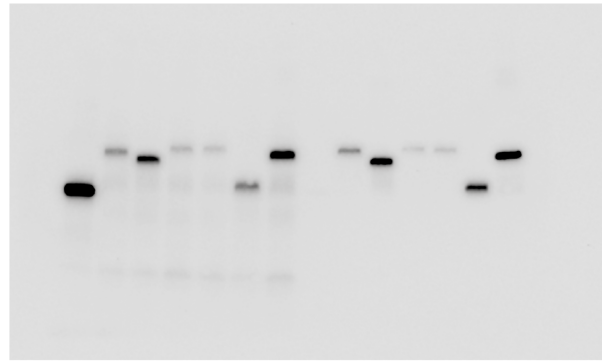

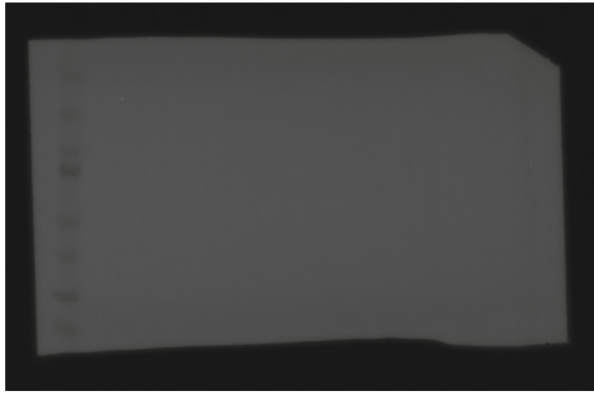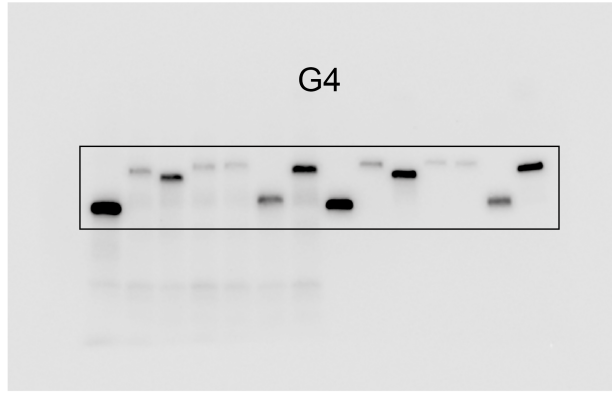

Replicate 1

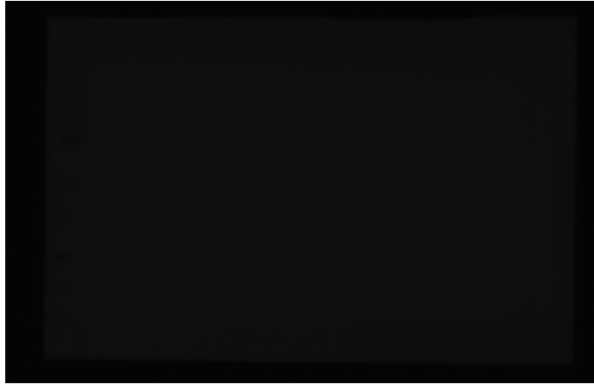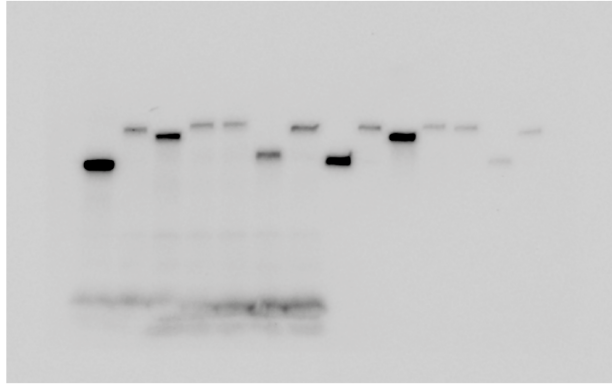

Replicate 2

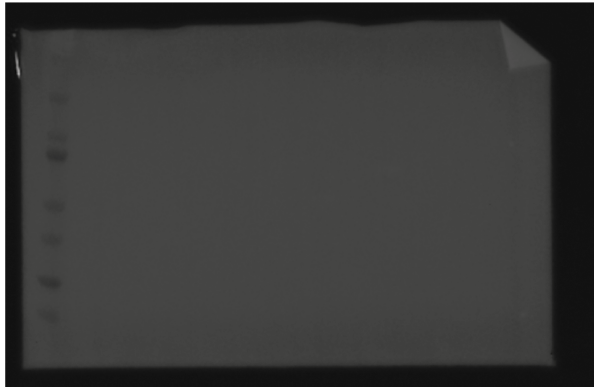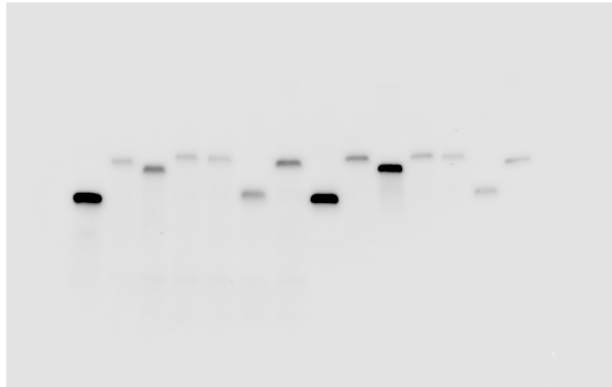

Replicate 3

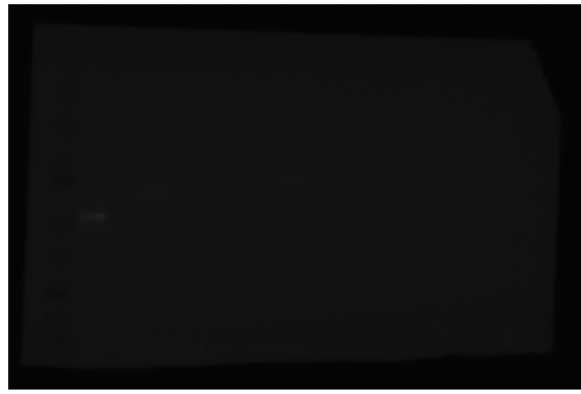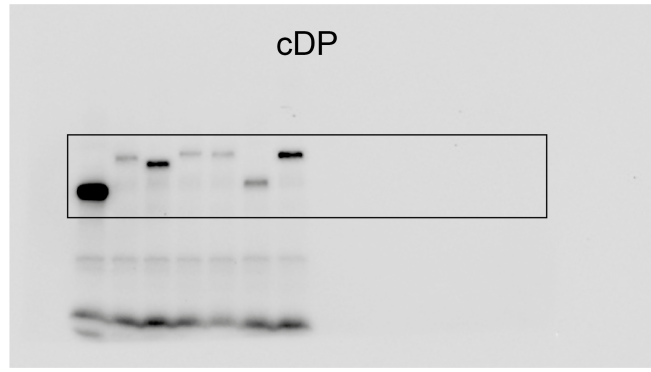

Replicate 1

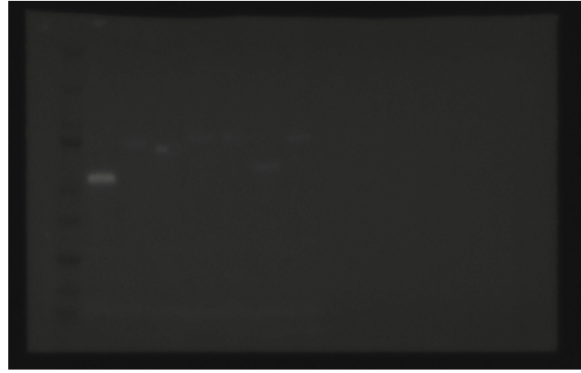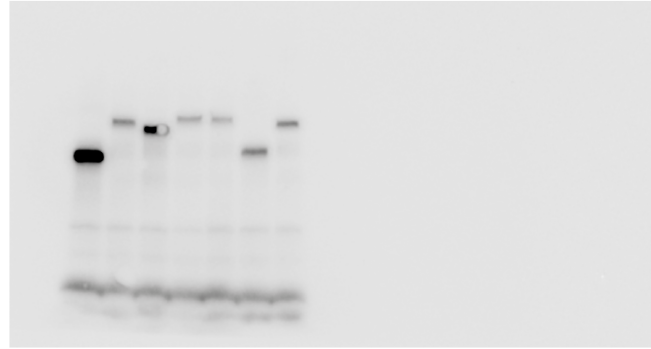

Replicate 2

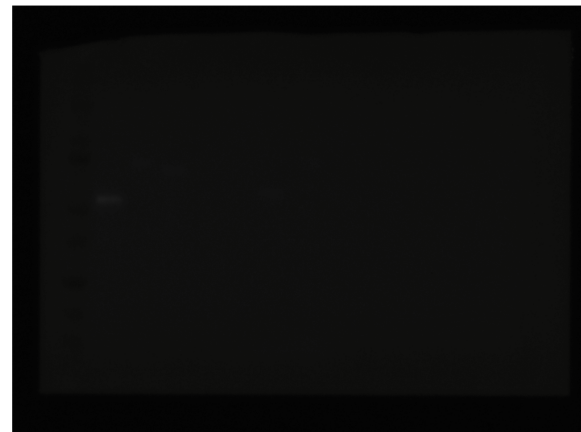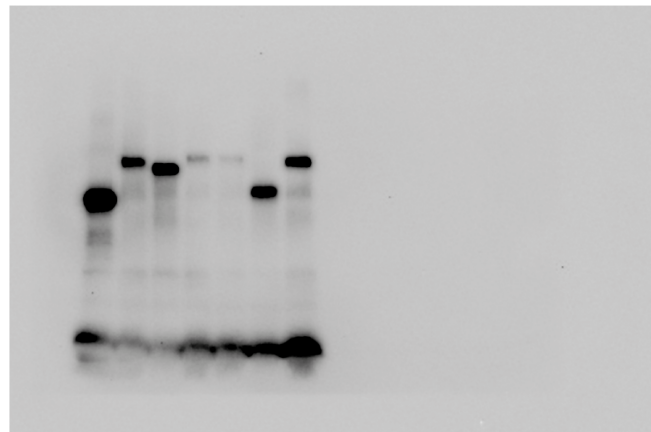

Replicate 3



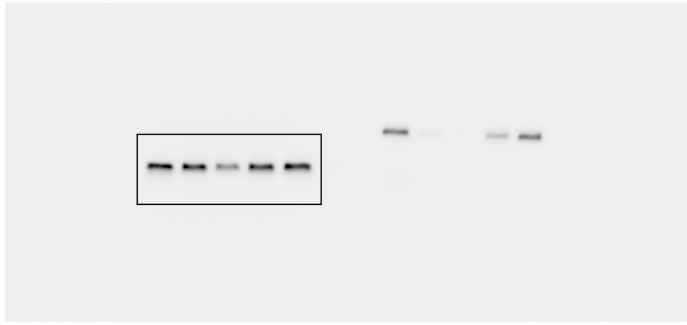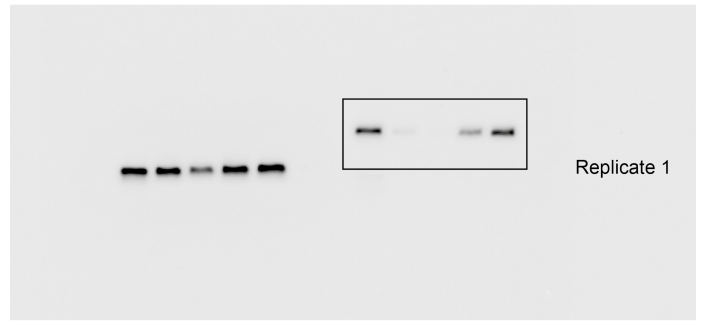

Replicate 1

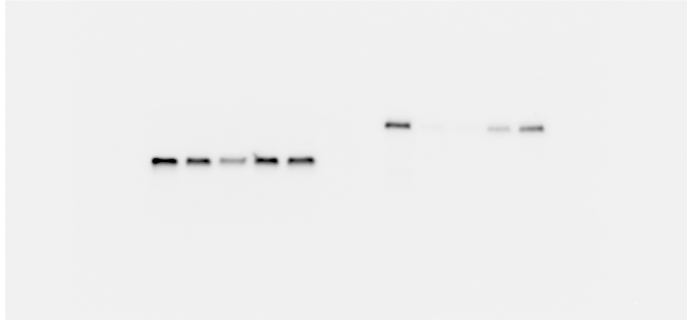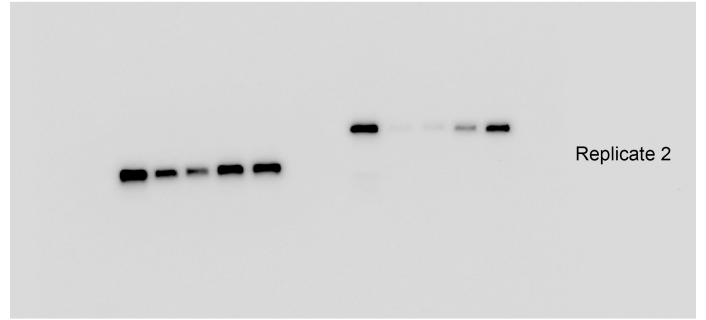

Replicate 2

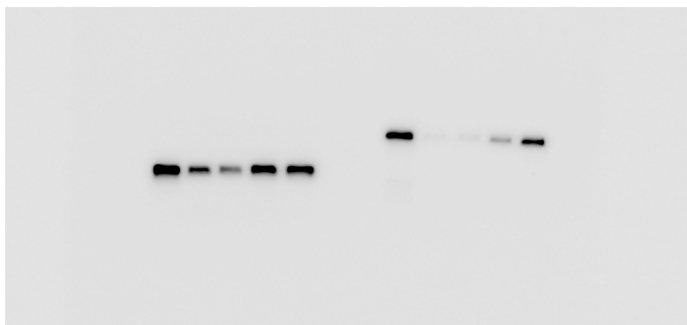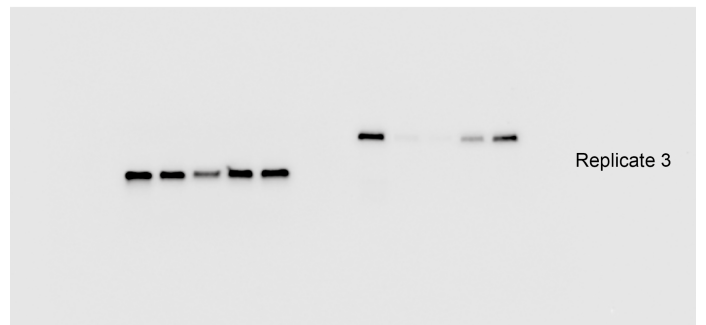

Replicate 3

Top Replicate 1

Top Replicate 2

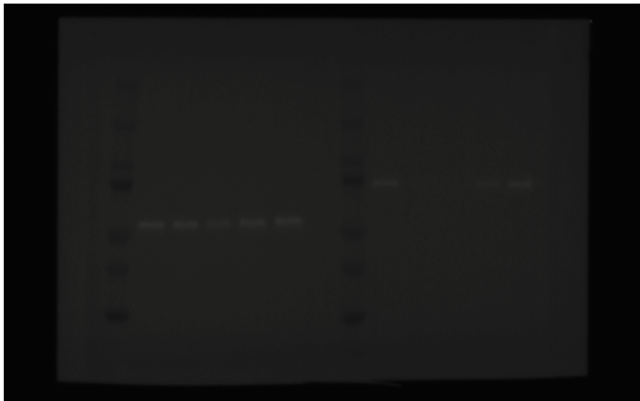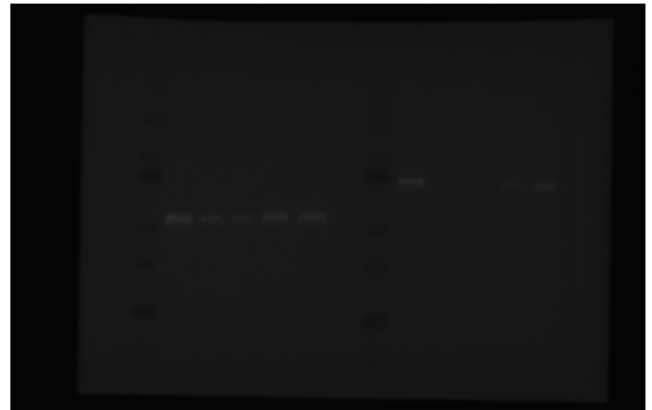

Top Replicate 3

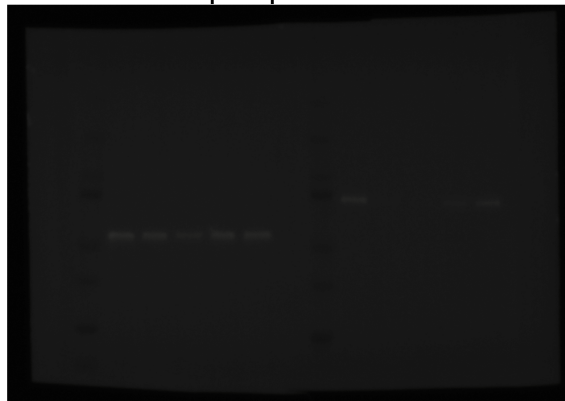

Supplement: MOESM8 [file 41418_2022_1030_MOESM8_ESM.pdf]
