# Supplementary material for: Designed Ankyrin Repeat Proteins as a tool box for analyzing p63
Source: Springer Nature journal article supplement (doi:10.1038/s41418-022-01030-y), 2022-06-18

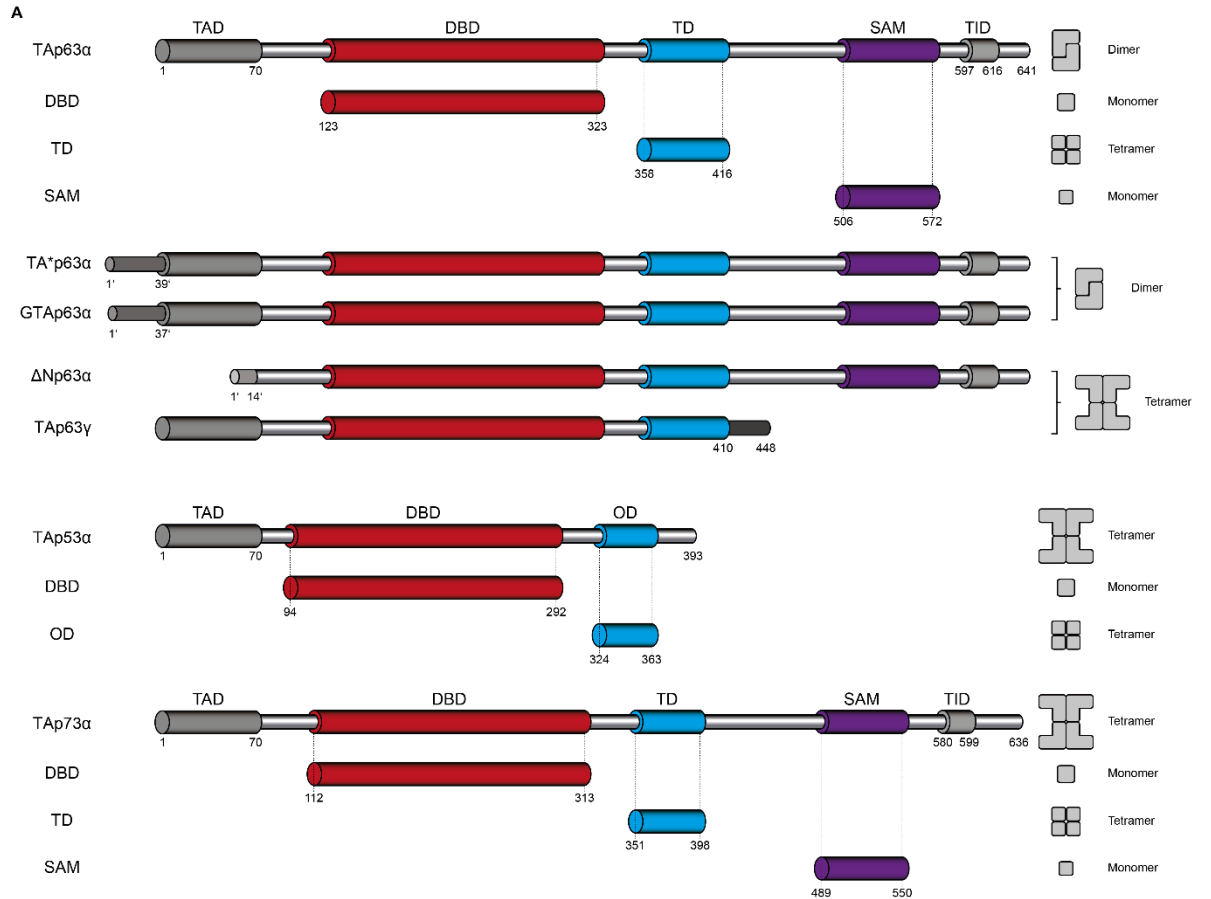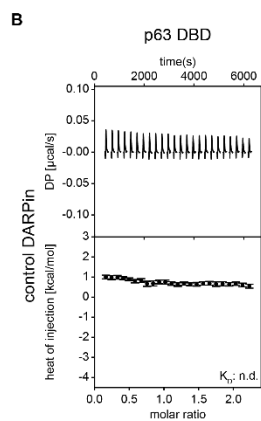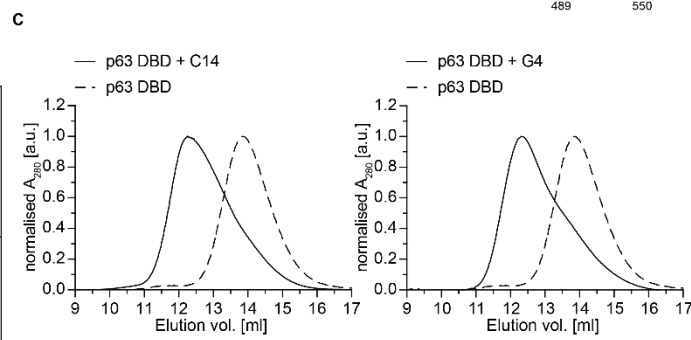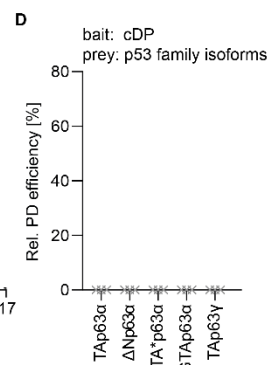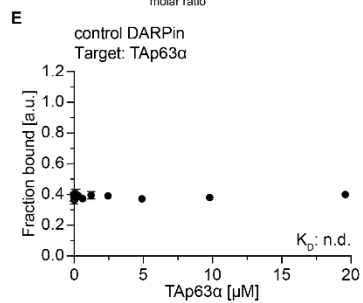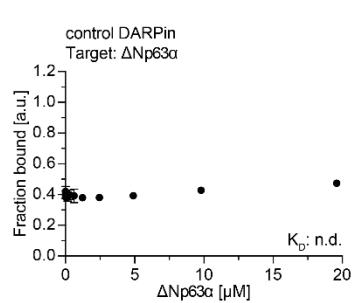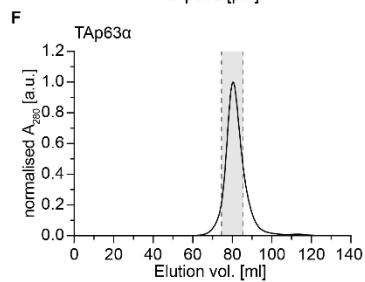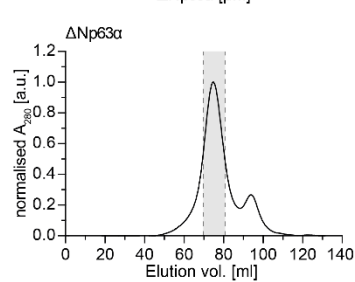

G

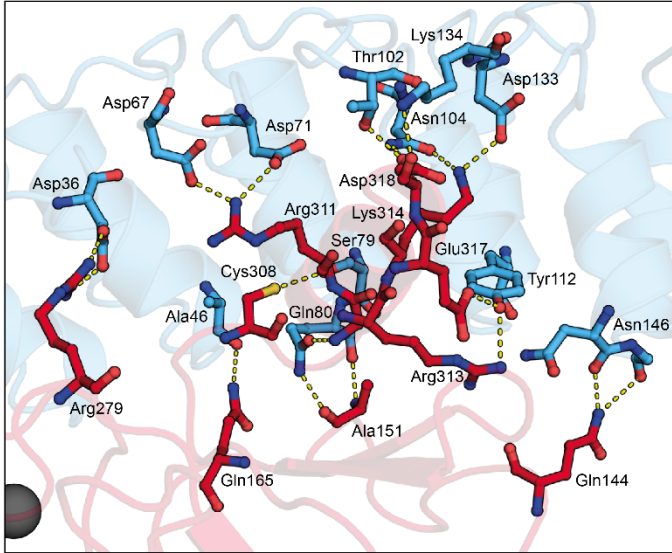

DARPin C14

p63 DBD

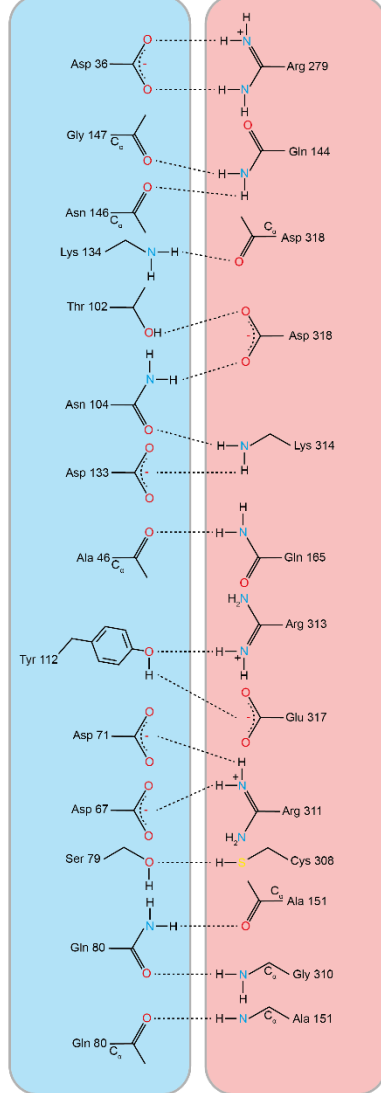

H

DARPin G4

p63 DBD

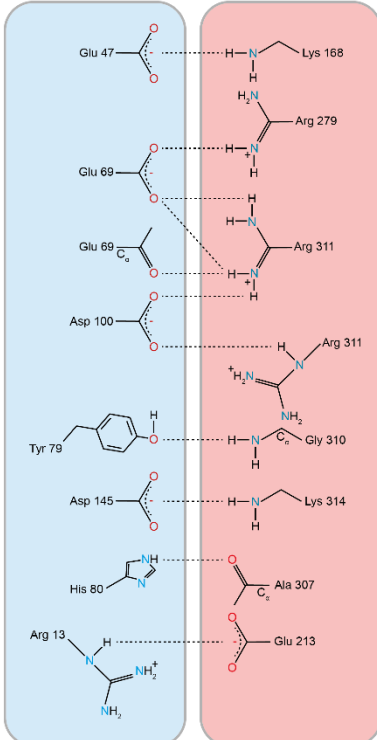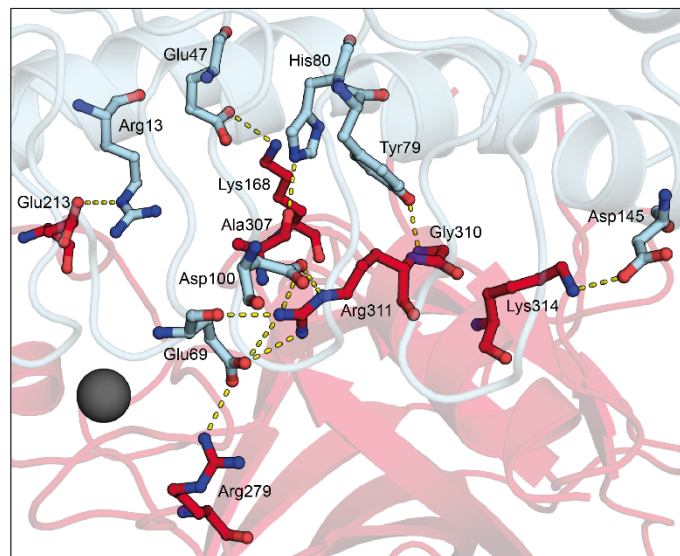

Supplement: MOESM2 [file 41418_2022_1030_MOESM2_ESM.pdf]
