# Supplementary material for: Designed Ankyrin Repeat Proteins as a tool box for analyzing p63
Source: Cell Death Differ. 2022 Jun 18;29(12):2445–58. doi: 10.1038/s41418-022-01030-y (PMC9751120; doi:10.1038/s41418-022-01030-y)
Supplement: Supplementary file 9 — Supplementary Table1 [file 41418_2022_1030_MOESM9_ESM.xlsx]

## Sheet: final
DARPin	Target	T	KA	KD	95% confidence interval		DH	95% confidence interval		DS	TDS	DG
		[°C]	[*106 M-1]	[nM]	min [nM]	max [nM]	[kcal mol-1]	min [kcal mol-1]	max [kcal mol-1]	[cal mol-1 K-1]	[kcal mol-1]	[kcal mol-1]
A5	p63 SAM	25	61.80	16.18	11.48	22.39	-9.47	-9.68	-9.27	3.87	1.15	-10.63
	p73 SAM	25	-	-	-	-	-	-	-	-	-	-
8F1	p53 OD	25	-	-	-	-	-	-	-	-	-	-
	p63 TD	25	18.61	53.73	41.04	69.86	-10.33	-10.80	-9.90	-1.40	-0.42	-9.92
	p73 TD	25	-	-	-	-	-	-	-	-	-	-
C14	p53 DBD	25	-	-	-	-	-	-	-	-	-	-
	p63 DBD	10	9.30	107.50	74.30	151.88	1.88	1.78	1.99	38.53	10.91	-9.03
	p73 DBD	25	62.74	15.94	10.08	23.38	-3.93	-4.00	-3.85	22.51	6.71	-10.64
G4	p53 DBD	25	4.88	204.92	159.81	261.58	3.36	3.22	3.51	41.86	12.48	-9.13
	p63 DBD	10	31.39	31.86	16.18	56.95	-3.72	-3.94	-3.51	21.82	6.51	-10.23
	p73 DBD	25	4.48	223.11	180.14	274.79	2.95	2.85	3.06	40.34	12.03	-9.07
