# Supplementary material for: Designed Ankyrin Repeat Proteins as a tool box for analyzing p63
Source: Cell Death Differ. 2022 Jun 18;29(12):2445–58. doi: 10.1038/s41418-022-01030-y (PMC9751120; doi:10.1038/s41418-022-01030-y)
Supplement: Supplementary file 10 — Supplementary Table2 [file 41418_2022_1030_MOESM10_ESM.xlsx]

## Sheet: final
DARPin	Target	T	KD	95% confidence interval
		[°C]	[nM]	min [nM]	max [nM]
A5	DNp63a	20	67.93	48.73	90.39
	TAp63a	20	296.50	190.90	437.30
8F1	DNp63a	20	95.61	73.49	120.90
	TAp63a	20	6159.00	4942.00	7691.00
C14	DNp63a	20	202.40	163.50	246.58
	TAp63a	20	733.90	514.00	1026.00
G4	DNp63a	20	137.20	118.70	157.40
	TAp63a	20	727.20	459.70	1111.00
